# Supplementary material for: UV and infrared absorption spectra, atmospheric lifetimes, and ozonedepletion and global warming potentials for CCl 2 FCCl 2 F (CFC-112),CCl 3 CClF 2 (CFC-112a), CCl 3 CF 3 (CFC-113a), andCCl 2 FCF 3 (CFC-114a)
Source: Copernicus journal article supplement (doi:10.5194/acp-16-8043-2016), 2016-07-01
Supplement: Supplementary file 2 [file acp-16-8043-2016-supplement.zip]

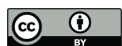

## *Supplement of*

# **UV and infrared absorption spectra, atmospheric lifetimes, and ozone depletion and global warming potentials for CCl<sub>2</sub>FCCl<sub>2</sub>F (CFC-112), CCl<sub>3</sub>CClF<sub>2</sub> (CFC-112a), CCl<sub>3</sub>CF<sub>3</sub> (CFC-113a), and CCl<sub>2</sub>FCF<sub>3</sub> (CFC-114a)**

**Maxine E. Davis et al.**

*Correspondence to:* James B. Burkholder ([james.b.burkholder@noaa.gov](mailto:james.b.burkholder@noaa.gov))

- [acp-16-8043-2016-supplement-title-page.pdf](#)
- Supplement
  - CFC-112.dx
  - CFC-112a.dx
  - CFC-113a.dx
  - CFC-114a.dx
  - Davis CFC paper Supplement-Revised.pdf

The copyright of individual parts of the supplement might differ from the CC-BY 3.0 licence.
